# Supplementary material for: Exploring MBTH as a spectrophotometric probe for the determination of total phenolic compounds in beverage samples
Source: Royal Society of Chemistry journal article supplement (doi:10.1039/c8ay00464a), 2018-01-01
Supplement: c8ay00464a1.pdf [file c8ay00464a1.pdf]

# SUPPLEMENTARY MATERIAL

**Exploring MBTH as spectrophotometric probe for total phenolic compounds determination  
in beverage samples**

Bruna da Silva Granja, José Ricardo Honório de Mendonça Filho, Woodland de Souza  
Oliveira, Josué Carinhanha Caldas Santos\*

Laboratório de Instrumentação e Desenvolvimento em Química Analítica (LINQA), Instituto de  
Química e Biotecnologia, Universidade Federal de Alagoas, Maceió, AL, 57072-900, Brazil.

\*✉ Corresponding author (Josué C. C. Santos, ORCID: 0000-0002-9525-5123)

E-mail address: [jcarinhanha@yahoo.com.br](mailto:jcarinhanha@yahoo.com.br) or [josue@iqb.ufal.br](mailto:josue@iqb.ufal.br)

Phone: +55 82 3214-1347

---

## Figures

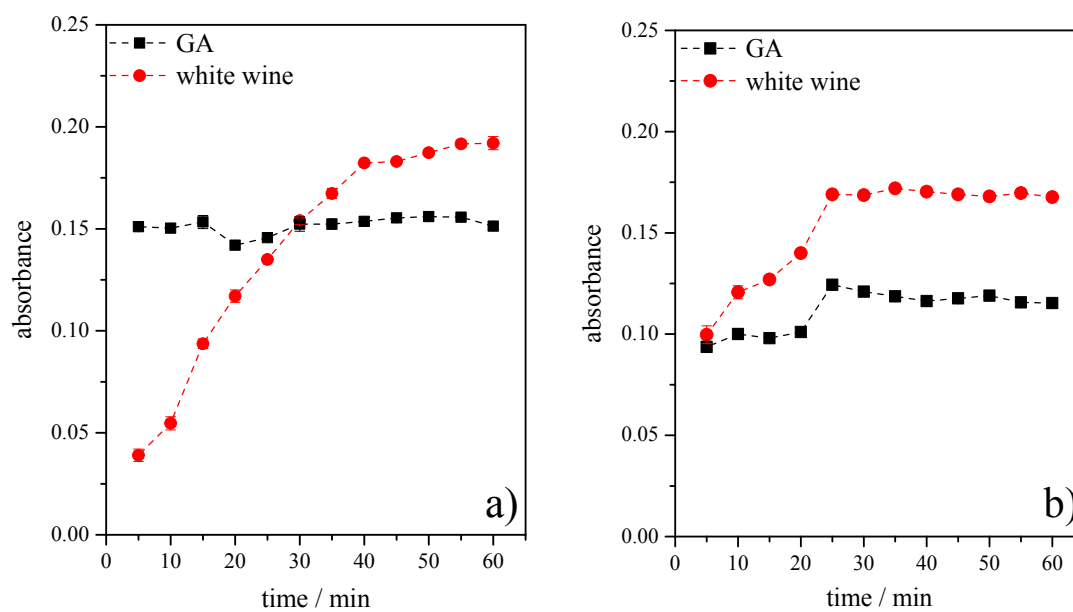

**Fig. S1.** Kinetic profile of the reaction between phenolic compounds and MBTH in acid medium against different oxidants, a) Fe(III) and b) Ce(IV).

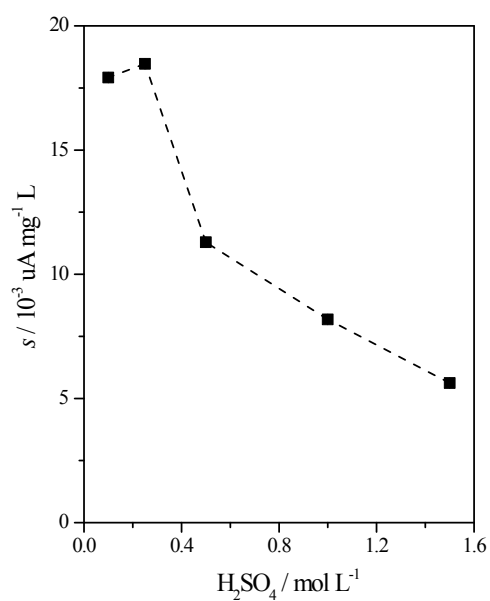

**Fig. S2.** Evaluation of  $H_2SO_4$  concentration. Conditions: [MBTH] = 18 mmol L<sup>-1</sup> and Fe(III) 0.1% (m/v).

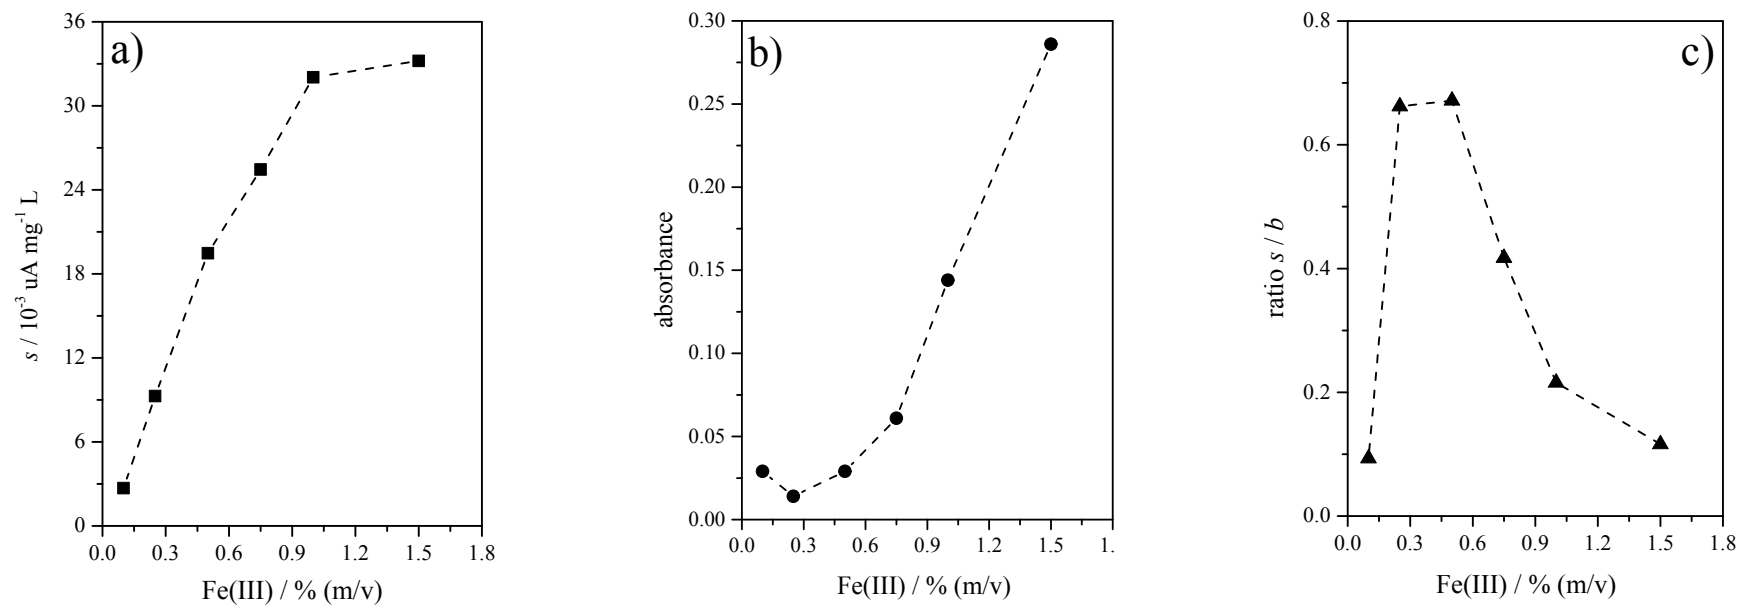

**Fig. S3.** a) Evaluation of Fe(III) concentration a) on analytical sensitivity, b) blank signal variation and c) ratio  $s$  (analytical sensitivity) /  $b$  (blank signal). Conditions: [MBTH] = 18 mmol L<sup>-1</sup>.

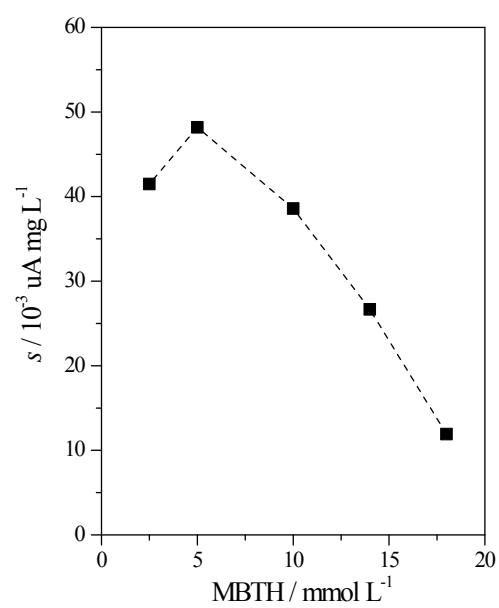

**Fig. S4.** Evaluation of MBTH concentration. Condition: Fe(III) 0.5% (m/v) and  $\text{H}_2\text{SO}_4$  at  $0.25 \text{ mol L}^{-1}$ .

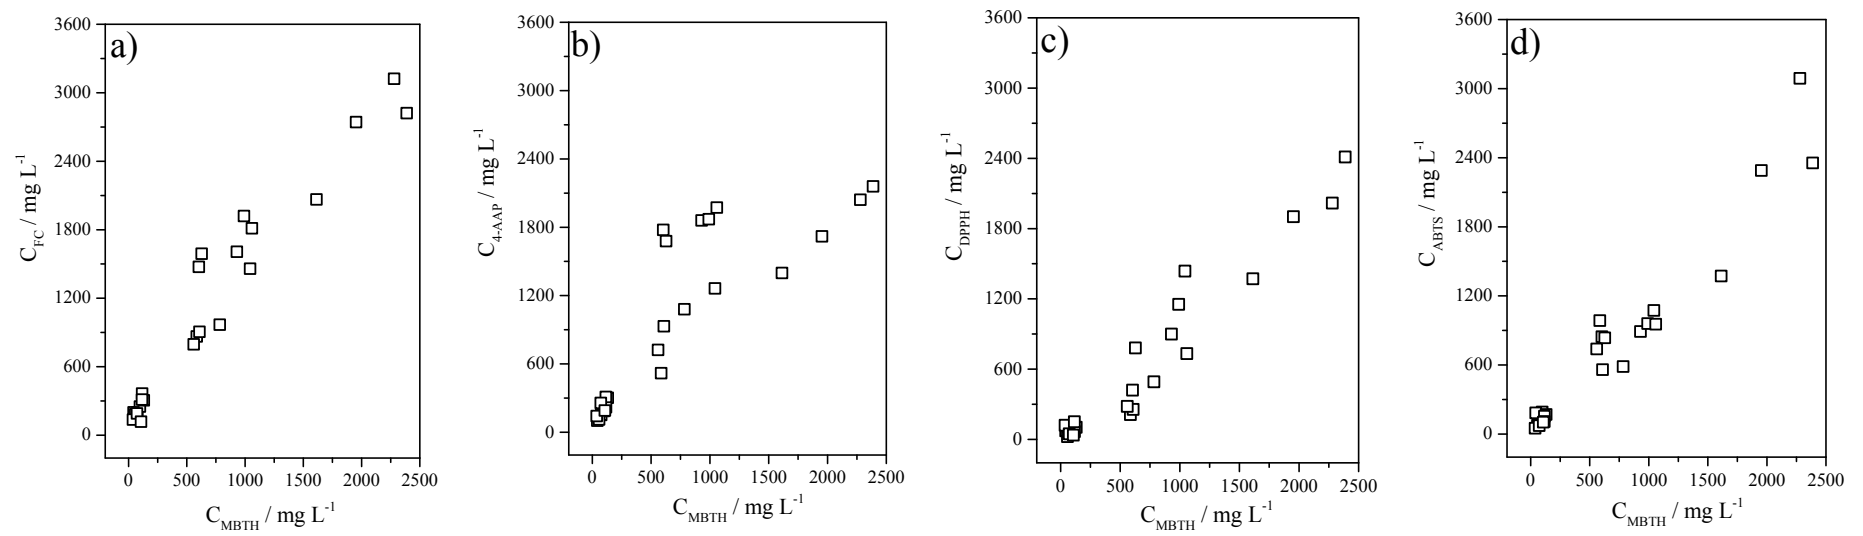

**Fig. S5** Linear correlation of the phenolic total concentration (GA, g L<sup>-1</sup>) in the samples ( $n = 24$ ) analyzed by different methods in relation to the proposed method: a) MBTH vs FC b) MBTH vs 4-AAP c) MBTH vs DPPH d) MBTH vs ABTS.

## Table

**Table S1**

Standard reduction potentials in aqueous solutions for Fe(III) and Ce(IV) in different acids.

| Half-reaction                     | Potential (V) | Acid (1 mol L <sup>-1</sup> )  |
|-----------------------------------|---------------|--------------------------------|
|                                   | 0.77          | -                              |
| Fe(III) + e <sup>-</sup> ⇌ Fe(II) | 0.70*         | HCl                            |
|                                   | 0.68*         | H <sub>2</sub> SO <sub>4</sub> |
| Ce(IV) + e <sup>-</sup> ⇌ Ce(III) | 1.28*         | HCl                            |
|                                   | 1.44*         | H <sub>2</sub> SO <sub>4</sub> |

\*formal electrode potential.
